# Supplementary material for: An electrochemical sensor based on metal–organic framework–chiral ionic liquid composites for the enantiorecognition of tryptophan enantiomers
Source: Royal Society of Chemistry journal article supplement (doi:10.1039/d3nj00869j), 2023-01-01
Supplement: d3nj00869j1.pdf [file d3nj00869j1.pdf]

**Electronic Supplementary Material (ESM)**

**An electrochemical sensor based on metal organic framework-  
chiral ionic liquid composites for the enantio recognition of  
tryptophan enantiomers**

Huipeng Hou, Shanshan Tang, Miao Liu, Fulai Zhang, Axin Liang, Liquan Sun, Lina  
Geng, Bingteng Xie, Yue Yi, Aiqin Luo\*

Key Laboratory of Molecular Medicine and Biotherapy, School of Life Science,  
Beijing Institute of Technology, Beijing 100081, China

\* Corresponding Author Phone: +86 10 68915996

E-mail: aqluobit@163.com (A. Luo)

## **S1. Experimental**

### *1.1 Materials*

Sodium dihydrogen phosphate anhydrous ( $\text{NaH}_2\text{PO}_4$ ) and Sodium phosphate dibasic dodecahydrate ( $\text{Na}_2\text{HPO}_4 \cdot 12\text{H}_2\text{O}$ ) were purchased from Innochem Bio-Chem Technology Co., Ltd. (Beijing, China). The chiral ionic liquid, 1-ethyl-3-methyl-imidazolium L-tartrate, was purchased from Chengjie Chem Co., Ltd. (Shanghai, China), and 2-aminoterephthalic acid was provided by Adamas-Beta Co., Ltd. (Shanghai, China). Moreover, L-tryptophan (L-Trp), D-tryptophan (D-Trp), L-cysteine (L-Cys), L-phenylalanine (L-Phen), D-phenylalanine (D-Phen), L-lysine (L-Lys), L-tyrosine enantiomers (L-Tyr), D-tyrosine enantiomers (D-Tyr), 5-Aminoquinoline, Chitosan (CS), multi-walled carbon nanotubes (MWCNTs) were purchased from Aladdin Bio-Chem Technology Co., Ltd. (Shanghai, China), with 10-30 $\mu\text{m}$  in length and 5-15nm in diameter. D-lysine (D-Lys) was purchased from Shanghai Bide Medical Technology Co., Ltd. (Shanghai, China). Potassium chloride (KCl) was provided by Tianjin Guangfu Fine Chemical Research Institute (Tianjin, China). Ferric chloride ( $\text{FeCl}_3$ ), N, N-dimethylformamide (DMF), Potassium ferricyanide ( $[\text{K}_3\text{Fe}(\text{CN})_6]$ ) and acetic acid (HAc) were purchased from Beijing Tong Guang Fine Chemicals Company (Beijing, China). Fetal bovine serum (FBS) was provided by Zhejiang Tianhang Biotechnology Co., Ltd. (Zhejiang, China). All reagents and solvents adopted in this work were analytically pure (AR). Ultrapure water (18.2  $\text{M}\Omega \cdot \text{cm}$ , 25 $^\circ\text{C}$ ) was used in all solution.

### *1.2 Apparatus*

The materials were obtained by CT15RT Versatile Refrigerated Centrifuge, and the images of surface morphology were gained by field emission scanning electron microscope (JSM-7500F). Furthermore, the XRD patterns are obtained by Rigaku Ultima IV X-ray diffractometer. The pH of phosphate-buffered saline (PBS) was determined by Sartorius pH (PB-10). All electrochemical measurements were examined using CHI6043E electrochemical workstation (Shanghai, China). And the traditional three-electrode system consisted of working electrode (glassy carbon electrode, GCE), reference electrode (saturated calomel electrode, SCE) and counter electrode (platinum wire, Pt).

## S2. Circular dichroism (CD) spectrum of Fe-CIL

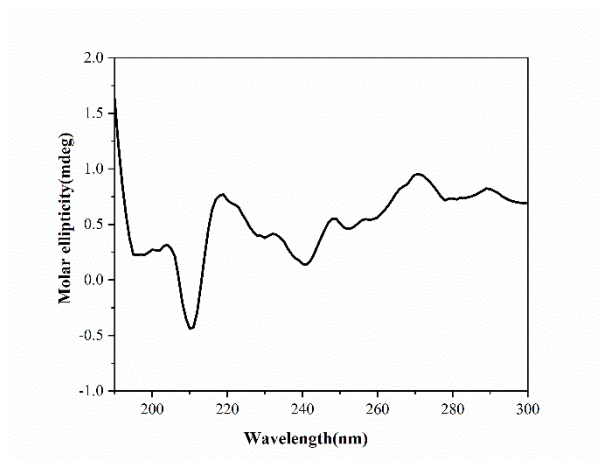

**Fig. S1.** The CD spectrum of Fe-CIL.

## S3. Calculation method of active surface area.

The *Randles-Sevcik* equation as follows could be used to calculate the active surface area in a reversible progress.

$$I_{pa} = (2.69 \times 10^5) n^{3/2} D^{1/2} C A v^{1/2}$$

$I_{pa}$  is the anodic peak current,  $n$  is the electron transfer number,  $A$  refers to the active surface area of the working electrode,  $D$  is the diffusion coefficient which was  $7.6 \times 10^{-6}$  cm/s for  $[\text{Fe}(\text{CN})_6]^{3-/4-}$ ,  $C$  is the concentration of  $[\text{Fe}(\text{CN})_6]^{3-/4-}$  and  $v$  is the CV scanning rate [1].

### Reference:

- [1] Patel B R, Imran S, Ye W Y, Weng H Y, Noroozifar M and Kerman K, *Electrochimica Acta*, 2020, 362: 137094.

## S4. Optimization of synthesis ratio of Fe-CIL

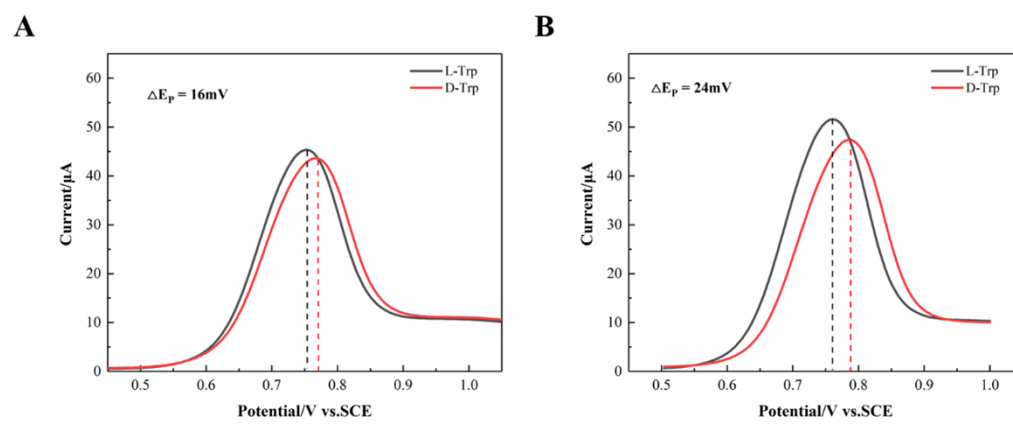

**Fig. S2.** Effect of the ratio of Fe-MIL-88-NH<sub>2</sub> to CIL on the performance of enantiorecognition of Trp enantiomers by Fe-CIL/GCE: (A) 1:1, (B) 2:1.

### S5. The formula of PBS buffer with different pH

**Table S1.** Volume ratios between NaH<sub>2</sub>PO<sub>4</sub>(0.10mol/L) and Na<sub>2</sub>HPO<sub>4</sub>(0.10mol/L) for the preparation of 0.10mol/L PBS with different pH values

| pH                     | 6.0       | 6.5       | 7.0       | 7.5       | 8.0      |
|------------------------|-----------|-----------|-----------|-----------|----------|
| Volume ratios<br>(v/v) | 87.7/12.3 | 68.5/31.5 | 39.0/61.0 | 16.0/84.0 | 5.3/94.7 |
